# Supplementary material for: Impact of the Obesity Paradox Between Sexes on In‐Hospital Mortality in Cardiogenic Shock: A Retrospective Cohort Study
Source: PubMed Central journal article supplement — J Am Heart Assoc. 2022 Jun 6;11(11):e024143. doi: 10.1161/JAHA.121.024143 (PMC9238714; doi:10.1161/jaha.121.024143), 2022-06-06
Supplement: JAH3-11-e024143-s001.pdf [file JAH3-11-e024143-s001.pdf]

# **SUPPLEMENTAL MATERIAL**

**Table S1. Baseline characteristics and clinical course between men and women.**

|                                                  | <b>Men<br/>(n=848)</b> | <b>Women<br/>(n=379)</b> | <b>P value</b> |
|--------------------------------------------------|------------------------|--------------------------|----------------|
| Age (years)                                      | 63.9 ± 13.1            | 69.4 ± 14.7              | <0.001         |
| Mean blood pressure (mmHg)                       | 55.7 ± 12.5            | 54.7 ± 22.2              | 0.464          |
| Body mass index (kg/m <sup>2</sup> )             | 23.7 ± 3.36            | 22.8 ± 3.85              | 0.012          |
| Obesity (body mass index >25 kg/m <sup>2</sup> ) | 278 (32.8%)            | 95 (25.1%)               | 0.007          |
| Left ventricular ejection fraction (%)           | 35.8 ± 16.2            | 36.3 ± 16.5              | 0.642          |
| Cardiac arrest as presentation                   | 165 (19.5%)            | 66 (14.7%)               | 0.443          |
| Cause of shock                                   |                        |                          | 0.018          |
| Acute etiology*                                  | 673 (79.4%)            | 277 (73.1%)              |                |
| Chronic etiology†                                | 175 (20.6%)            | 102 (26.9%)              |                |
| Ischemic cause                                   | 730 (84.9%)            | 276 (71.6%)              | <0.001         |
| Comorbidities                                    |                        |                          |                |
| Hypertension                                     | 429 (49.9%)            | 231 (59.7%)              | 0.001          |
| Diabetes mellitus                                | 307 (35.7%)            | 136 (35.1%)              | 0.850          |
| Dyslipidemia                                     | 240 (27.9%)            | 90 (23.3%)               | 0.085          |
| Current smoker                                   | 572 (66.5%)            | 36 (9.3%)                | <0.001         |
| Chronic kidney disease                           | 78 (9.1%)              | 45 (11.6%)               | 0.161          |
| Peripheral arterial occlusive disease            | 39 (4.5%)              | 13 (3.4%)                | 0.337          |
| Prior myocardial infarction                      | 125 (14.5%)            | 35 (9.0%)                | 0.007          |
| Prior cerebrovascular accident                   | 79 (9.2%)              | 40 (10.3%)               | 0.523          |
| Laboratories                                     |                        |                          |                |
| Hemoglobin (mg/dL)                               | 13.3 ± 2.5             | 11.3 ± 2.2               | 0.004          |
| Lactic acid (mmol/L)                             | 6.69 ± 4.58            | 6.60 ± 4.43              | 0.397          |
| NT-proBNP (pg/dL)*                               | 2210.0 [241.4, 8245.0] | 5162.0 [1018.0, 17323.0] | <0.001         |
| Clinical course                                  |                        |                          |                |
| Mechanical ventilation                           | 486 (56.5%)            | 223 (57.6%)              | 0.714          |

|                                    |               |               |       |
|------------------------------------|---------------|---------------|-------|
| Intra-aortic balloon pump          | 224 (26.0%)   | 90 (23.3%)    | 0.294 |
| Extracorporeal membrane oxygenator | 341 (39.7%)   | 151 (39.0%)   | 0.832 |
| ECMO duration (days)               | 5.6 ± 6.0     | 5.5 ± 5.2     | 0.861 |
| Shock to ECMO time (minutes)       | 413.2 ± 886.1 | 400.6 ± 743.1 | 0.880 |
| ICU stay (days)                    | 11.6 ± 23.6   | 12.1 ± 24.8   | 0.754 |
| Hospital stay (days)               | 19.1 ± 36.8   | 21.4 ± 30.5   | 0.278 |
| In-hospital death                  | 272 (31.6%)   | 147 (38.0%)   | 0.028 |

---

Values are mean ± standard deviation or number (%).

\* Acute etiology included acute myocardial infarction, myocarditis, stress-induced cardiomyopathy, and pulmonary embolism.

† Chronic etiology included ischemic cardiomyopathy, dilated cardiomyopathy, valvular heart disease, arrhythmia, heart transplant rejection, and unspecified cardiomyopathy.

\* Presented as median [25<sup>th</sup> percentiles, 75<sup>th</sup> percentiles]

NT-proBNP; N-terminal-pro-brain natriuretic peptide, ECMO; extracorporeal membranous oxygenation , ICU; intensive care unit

**Table S2. Risk of in-hospital mortality according to body-mass index for the whole study population.**

|                    | <b>Event rate (%)</b> | <b>Unadjusted OR</b>              | <b>95% CI</b> | <b>P value</b> |
|--------------------|-----------------------|-----------------------------------|---------------|----------------|
| <b>Underweight</b> | 29.7                  | 0.77                              | 0.47-1.25     | 0.285          |
| <b>Normal</b>      | 35.5                  |                                   | Reference     |                |
| <b>Overweight</b>  | 36.6                  | 1.05                              | 0.77-1.42     | 0.760          |
| <b>Obese</b>       | 27.0                  | 0.67                              | 0.50-0.91     | 0.009          |
|                    |                       | <b>Age-adjusted OR</b>            | <b>95% CI</b> | <b>P value</b> |
| <b>Underweight</b> |                       | 0.71                              | 0.43-1.16     | 0.170          |
| <b>Normal</b>      |                       |                                   | Reference     |                |
| <b>Overweight</b>  |                       | 1.05                              | 0.77-1.43     | 0.746          |
| <b>Obese</b>       |                       | 0.74                              | 0.55-0.99     | 0.048          |
|                    |                       | <b>Sex-adjusted OR</b>            | <b>95% CI</b> | <b>P value</b> |
| <b>Underweight</b> |                       | 0.75                              | 0.46-1.21     | 0.238          |
| <b>Normal</b>      |                       |                                   | Reference     |                |
| <b>Overweight</b>  |                       | 1.08                              | 0.79-1.46     | 0.631          |
| <b>Obese</b>       |                       | 0.69                              | 0.51-0.93     | 0.015          |
|                    |                       | <b>Multivariable-adjusted* OR</b> | <b>95% CI</b> | <b>P value</b> |
| <b>Underweight</b> |                       | 0.76                              | 0.46-1.25     | 0.279          |
| <b>Normal</b>      |                       |                                   | Reference     |                |
| <b>Overweight</b>  |                       | 1.03                              | 0.75-1.41     | 0.848          |
| <b>Obese</b>       |                       | 0.72                              | 0.53-0.98     | 0.036          |

Based on body mass index, patients were stratified into underweight (BMI<18.5 kg/m<sup>2</sup>), normal (18.5≤BMI<23.0 kg/m<sup>2</sup>), overweight (23.0≤BMI<25.0 kg/m<sup>2</sup>), and obese (BMI≥25.0 kg/m<sup>2</sup>)

\* Multivariable logistic regression analysis was performed with the variables of age, sex, acute etiology of shock, hypertension, diabetes mellitus, dyslipidemia, current smoker, and prior myocardial infarction.

CI, confidence interval; OR, odds ratio.

Figure S1. Study flow.

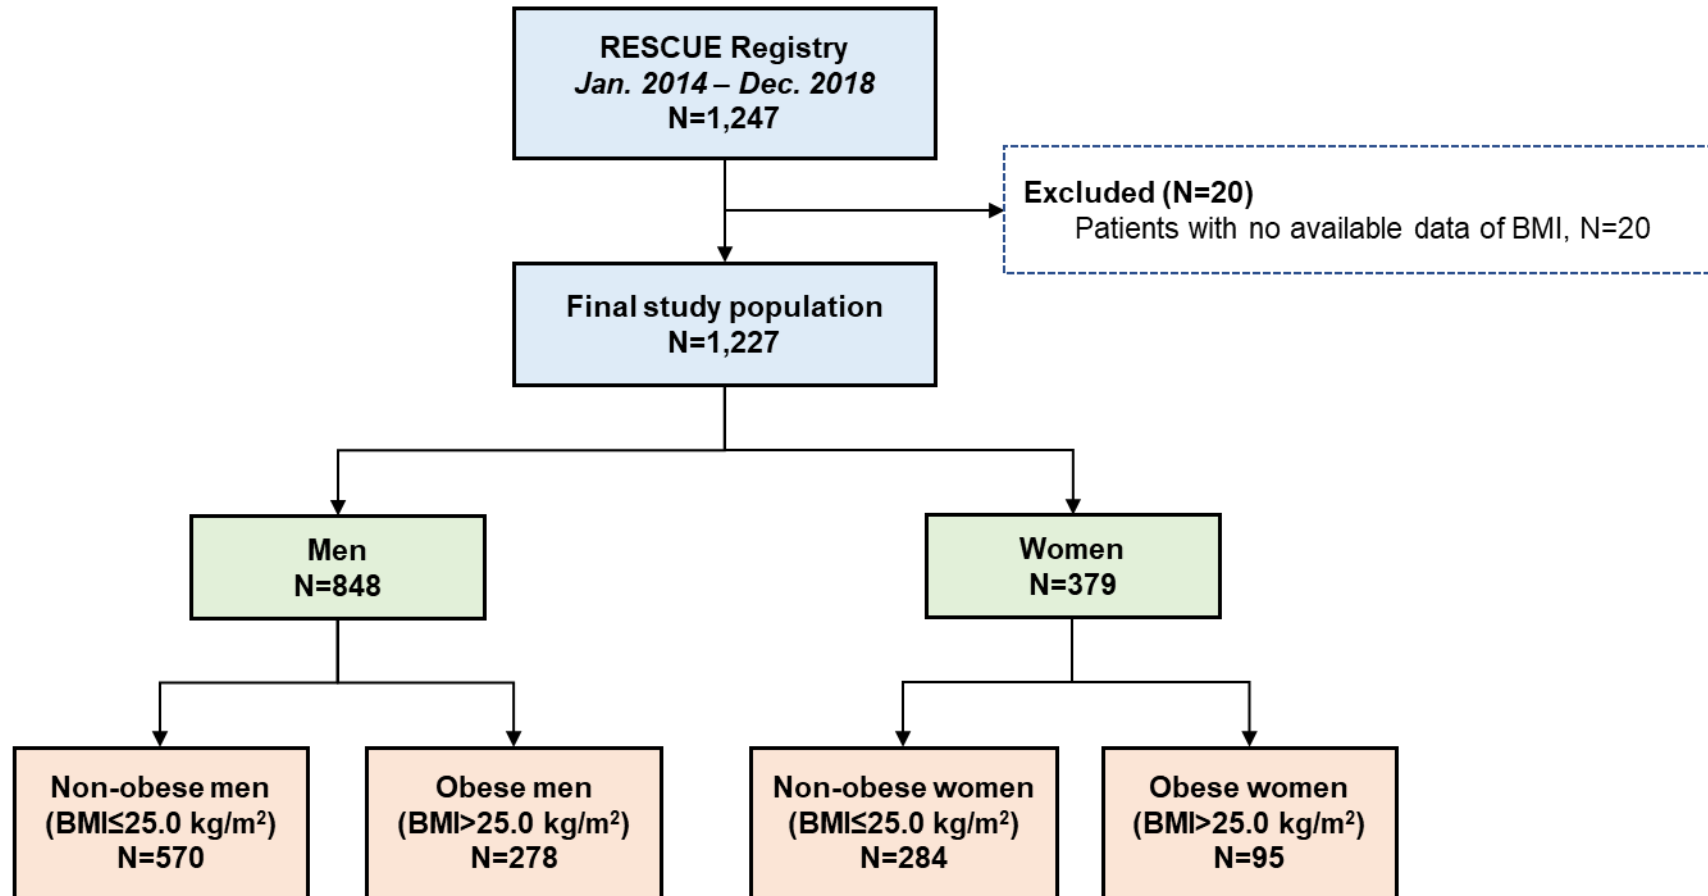

BMI, body mass index; RESCUE, REtrospective and prospective observational Study to investigate Clinical oUtcomes and Efficacy of left ventricular assist device for Korean patients with cardiogenic shock.
